1 **TLR5 participates in the TLR4 receptor complex and biases towards MyD88-dependent**  
2 **signaling in environmental lung injury**

3 Salik Hussain<sup>1\*</sup>, Collin G Johnson<sup>1\*</sup>, Joseph Scieurba<sup>1\*</sup>, Xianglin Meng<sup>1</sup>, Vandy P Stober<sup>1</sup>, Caini  
4 Liu<sup>2</sup>, Jaime M Cyphert-Daly<sup>1</sup>, Katarzyna Bulek<sup>2,3</sup>, Wen Qian<sup>2</sup>, Alma Solis<sup>1</sup>, Yosuke Sakamachi<sup>1</sup>,  
5 Carol S Trempus<sup>1</sup>, Jim J Aloor<sup>4</sup>, Kym M Gowdy<sup>4</sup>, W. Michael Foster<sup>5</sup>, John W Hollingsworth<sup>5</sup>,  
6 Robert M Tighe<sup>5</sup>, Xiaoxia Li<sup>2</sup>, Michael B Fessler<sup>1</sup>, Stavros Garantziotis<sup>1#</sup>

7 1 National Institute of Environmental Health Sciences, Research Triangle Park, NC 27709, USA

8 2 Lerner Research Institute, Cleveland Clinic Foundation, Cleveland, OH 44195, USA

9 3 Department of Immunology, Faculty of Biochemistry, Biophysics and Biotechnology,  
10 Jagiellonian University, Krakow, Poland

11 4 East Carolina University Brody School of Medicine, Greenville, NC 27834, USA

12 5 Duke University Medical Center, Durham, NC 27710, USA

13 \*equal contribution as first authors

14 # Corresponding Author and Lead Contact

15 Current Affiliations: CG Johnson : Baylor University. J Scieurba : NC State University. JM

16 Cyphert-Daly : Duke University. JJ Aloor : East Carolina University

17

18 **Running title:**

19 Tlr5 participates in Tlr4 signaling

20 **Conflict of Interest statement:**

21 The authors have declared that no conflict of interest exists.

22

23 **Abstract**

24 Lung disease causes significant morbidity and mortality, and is exacerbated by environmental  
25 injury, e.g. through lipopolysaccharide (LPS) or ozone (O<sub>3</sub>). Toll-like receptors (TLRs) orchestrate  
26 immune responses to injury by recognizing pathogen- or danger-associated molecular patterns.  
27 TLR4, the prototypic receptor for LPS, also mediates inflammation after O<sub>3</sub>, triggered by  
28 endogenous hyaluronan. Regulation of TLR4 signaling is incompletely understood. TLR5, the  
29 flagellin receptor, is expressed in alveolar macrophages, and regulates immune responses to  
30 environmental injury. Using *in vivo* animal models of TLR4-mediated inflammations (LPS, O<sub>3</sub>,  
31 hyaluronan), we show that TLR5 impacts the *in vivo* response to LPS, hyaluronan and O<sub>3</sub>. We  
32 demonstrate that immune cells of human carriers of a dominant negative TLR5 allele have  
33 decreased inflammatory response to O<sub>3</sub> exposure *ex vivo* and LPS exposure *in vitro*. Using  
34 primary murine macrophages, we find that TLR5 physically associates with TLR4 and biases  
35 TLR4 signaling towards the MyD88 pathway. Our results suggest an updated paradigm for  
36 TLR4/TLR5 signaling.

37 Word count: 155

38 Trial registration numbers: NCT01087307, NCT00341237, NCT00574158

39 Funding: This research was supported, in part, by the Intramural Research Program of the NIH,  
40 National Institute of Environmental Health Sciences, Z01ES102605 (SG) and Z01ES102005  
41 (MBF).

42

## 43 **Introduction**

44 Lung disease is a major contributor to morbidity and mortality worldwide. In the US alone, over  
45 15% of the population suffers from lung disease, at an annual cost of 120,000 deaths, and >\$50  
46 billion (1-3). Environmental lung injury, e.g. through inhaled lipopolysaccharide (LPS) or elevated  
47 ozone (O<sub>3</sub>) levels, exacerbates lung disease (4-7). For example, household LPS levels are directly  
48 associated with asthma symptoms and asthma-related health care utilization (7). Also, sound  
49 epidemiological studies suggest that for every 10 parts-per-billion (ppb) increase in O<sub>3</sub> levels there  
50 is an associated mortality increase of 0.39-0.87% (5, 8). It is therefore imperative to understand  
51 the mechanisms of environmentally induced lung injury.

52 Innate immune activation is a major contributor to lung disease pathogenesis and  
53 environmentally-induced exacerbations (9, 10). Toll-like receptors (TLRs) orchestrate the innate  
54 immune response to lung injury by recognizing exogenous pathogen- or endogenous danger-  
55 associated molecular patterns. TLR4 is the prototypic receptor for LPS (11), which is found in  
56 particulate-matter pollution and house dust (7, 12) and is a major contributor to sepsis-induced  
57 lung injury (13, 14). TLR4 also mediates inflammation and airway hyperresponsiveness after O<sub>3</sub>  
58 exposure (15), triggered by release of the endogenous sugar hyaluronan (16).

59 Regulation of TLR4 signaling is still incompletely understood. TLR4 can heterodimerize with other  
60 TLR like TLR2 and TLR6 (17, 18); in these cases, the partner TLRs serve to expand the TLR4  
61 ligand spectrum. However, until now there has not been evidence of TLR4 interaction with other  
62 TLR, that modulates TLR4 signaling in response to its own ligands. TLR4-TLR5 interaction has  
63 been reported once (19), wherein TLR4 was shown to promote nitric oxide production after  
64 flagellin exposure. We therefore hypothesized that the reciprocal interaction may also be true, i.e.  
65 TLR5 participates in TLR4 signaling after environmental lung injury. TLR5, the prototypic receptor  
66 for bacterial flagellin, is expressed in alveolar macrophages (20), is induced after injury (21) and

67 regulates the immune response to injury (22-24). TLR5 plays an important role in immunity and  
68 metabolism and has been implicated in processes as varied as asthma (24), antiviral defense  
69 (25), ischemia-reperfusion injury (26, 27), radiation–induced injury (22, 28), and regulation of gut  
70 immunity (23). Furthermore, known functional genetic polymorphisms in *TLR5* are associated with  
71 susceptibility to infections (29-31) and autoimmune disease (32). These findings suggest a  
72 clinically relevant role of TLR5 in human immune regulation in the response to injury.

73 We show that TLR5 deficiency in mice significantly alters the *in vivo* response to TLR4 activators  
74 LPS, hyaluronan and O<sub>3</sub>. Mechanistically, we show that after ultrapure LPS exposure, TLR5 co-  
75 immunoprecipitates with MyD88, TLR4 and LPS. The presence of TLR5 promotes formation of  
76 the Myddosome, i.e. association of MyD88 and IRAK4, and biases TLR4 signaling towards the  
77 MyD88 pathway. Finally, we demonstrate that human carriers of a dominant-negative TLR5 allele  
78 have decreased inflammatory response to O<sub>3</sub> exposure *in vivo* and LPS exposure *in vitro*. Our  
79 results thus suggest that TLR5 participates in TLR4 signaling and modulates environmental lung  
80 injury in disease-relevant exposures that lead to TLR4 activation.

81 **Results**

82 **TLR5 promotes TLR4-mediated inflammation and airway hyperresponsiveness *in vivo*.**

83 We first investigated the effect of TLR5 on TLR4 signaling *in vivo*, by exposing *Tlr5*-deficient mice  
84 or wildtype controls to LPS via intraperitoneal administration. As expected, this led to substantial  
85 lung inflammation in wildtype mice, which was ameliorated in the absence of TLR5 (**Fig. 1A**).  
86 TLR5 deficiency also ameliorated cellular influx and lung injury as evidenced by lung lavage  
87 protein (**Fig. 1B**). Furthermore, expression of inflammatory cytokines in the lung was significantly  
88 ameliorated in *Tlr5*-deficient mice (**Fig. 1C**). This was largely mirrored in a reduction of  
89 inflammatory gene expression in the liver (**Supplementary Fig. 1A**). To ensure that our results  
90 were not affected by obesity-, microbiome- or breeding-related immune perturbations, we  
91 performed experiments with mice that were either purchased from a commercial vendor (using  
92 C57BL/6 as controls) or bred in our NIEHS colony (using wild-type littermates as controls) and  
93 treated some mice with neomycin to reduce bacterial burden in the intestinal tract. Our results did  
94 not vary regardless of mouse provenance or antibiotic treatment (**Supplementary Fig. 1B**).

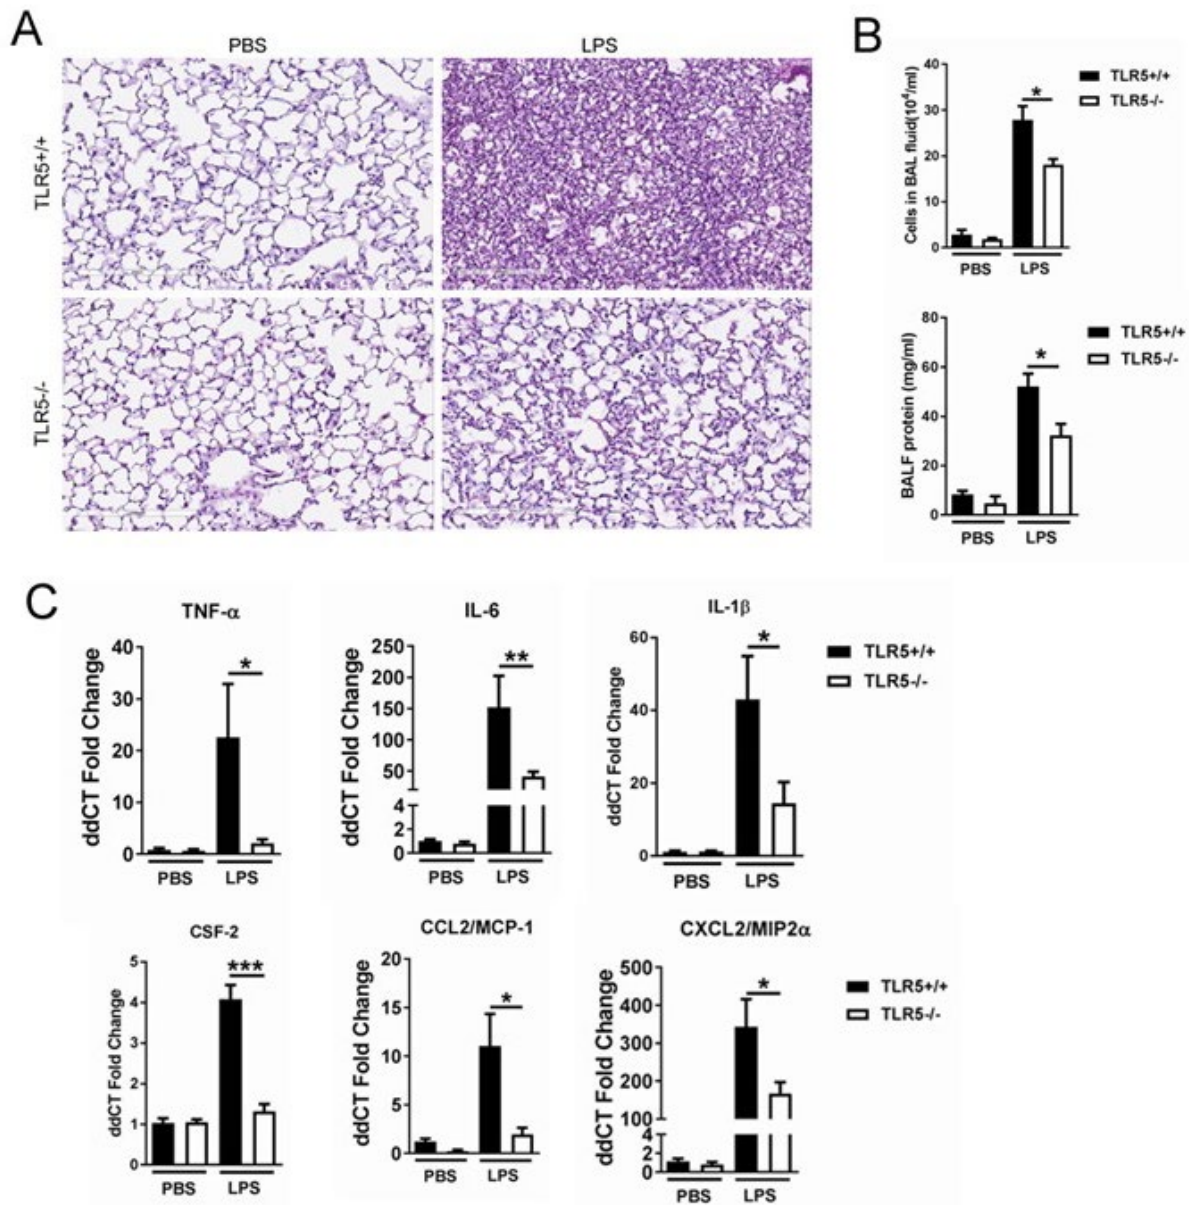

**Figure 1.** TLR5 deficiency ameliorates the inflammatory lung response to systemic LPS. **(A)** Hematoxylin-Eosin staining of lung sections demonstrates LPS-induced lung injury is ameliorated in Tlr5-deficient (TLR5<sup>-/-</sup>) mice. **(B)** Cellular lung inflammation and lung lavage protein levels are decreased in Tlr5-deficient (TLR5<sup>-/-</sup>) mice. **(C)** Real time quantitative PCR analysis of inflammatory cytokines shows a significant decrease in Tlr5-deficient (TLR5<sup>-/-</sup>) mice. N=5-8 mice per group, experiment repeated twice. Data are represented as mean ± s.e.m. and were analyzed by unpaired t test with Welch's correction \* P<0.05 and \*\* P<0.01 between TLR5<sup>+/+</sup> and TLR5<sup>-/-</sup> mice.

95 To determine if the TLR5 effect on TLR4 signaling has broader biological and clinical relevance  
 96 in the lung, we explored TLR5-mediated effects on sterile lung injury after exposure to the ambient

97 pollutant, O<sub>3</sub>. O<sub>3</sub> exposure is associated with increased morbidity and mortality in human patients  
 98 with cardiopulmonary disease (5, 8); furthermore, it is now understood that TLR4 mediates the  
 99 development of inflammation and airway hyperresponsiveness (AHR) after O<sub>3</sub> exposure (15). We  
 100 used an O<sub>3</sub> dose that is equivalent to human exposure during a high-O<sub>3</sub> day (33, 34). *Tlr5*-deficient  
 101 mice had ameliorated airway cytokine expression and almost abolished AHR after O<sub>3</sub> exposure  
 102 (Fig. 2A, B). Because hyaluronan is the endogenous danger-associated molecular pattern that

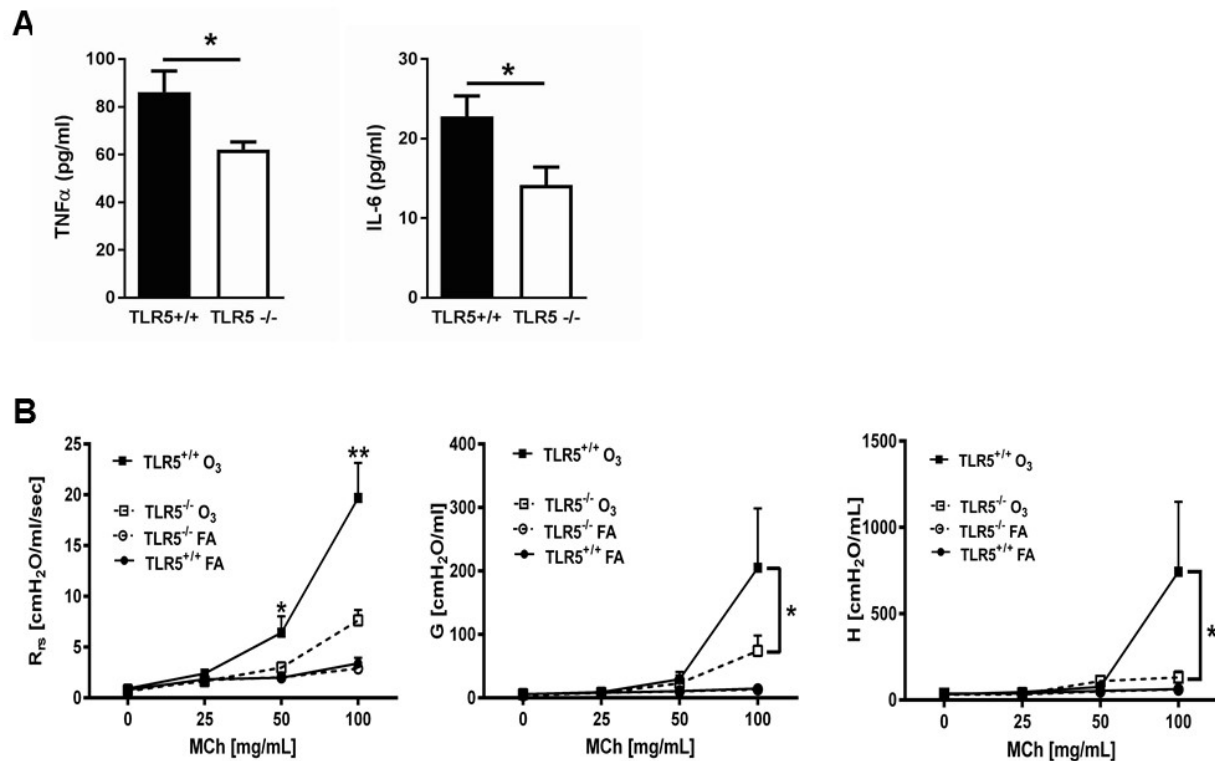

**Figure 2.** TLR5 deficiency ameliorates the *in vivo* inflammatory response to inhaled O<sub>3</sub>. (A) TNF- $\alpha$  and IL-6 levels in the lung lavage fluid of *Tlr5*-deficient (TLR5<sup>-/-</sup>) or *Tlr5*-competent (TLR5<sup>+/+</sup>) mice 24 hours after receiving 3 ppm O<sub>3</sub> for 3 hours by inhalation. n = 14 mice for TLR5<sup>+/+</sup> and n = 12 mice for TLR5<sup>-/-</sup>, experiment repeated twice. (B) Airway physiology measurement (total respiratory resistance R<sub>rs</sub>, tissue damping G and tissue elastance H) to indicated doses of methacholine challenge measured with flexiVent in *Tlr5*-deficient (TLR5<sup>-/-</sup>) or *Tlr5*-competent (TLR5<sup>+/+</sup>) mice 24 hours after 2ppm O<sub>3</sub> or air (FA) exposure. n = 6 for TLR5<sup>-/-</sup>FA and TLR5<sup>-/-</sup>O<sub>3</sub> and n = 7 for TLR5<sup>+/+</sup>FA and TLR5<sup>+/+</sup>O<sub>3</sub>, experiment repeated three times. Data are represented as mean  $\pm$  s.e.m. and were analyzed by unpaired t test with Welch's correction \* P<0.05 and \*\* P<0.01 between TLR5<sup>+/+</sup> and TLR5<sup>-/-</sup> mice exposed to O<sub>3</sub>

103 activates TLR4 and mediates the response after O<sub>3</sub> exposure (15, 16), we then investigated the  
 104 effect of TLR5 on hyaluronan signaling. *Tlr5*-deficient mice had substantially reduced

105 inflammatory gene induction and significantly diminished AHR after instilled ultrapure  
 106 (pharmaceutical grade) hyaluronan exposure (Fig. 3A, B). We then performed a more global

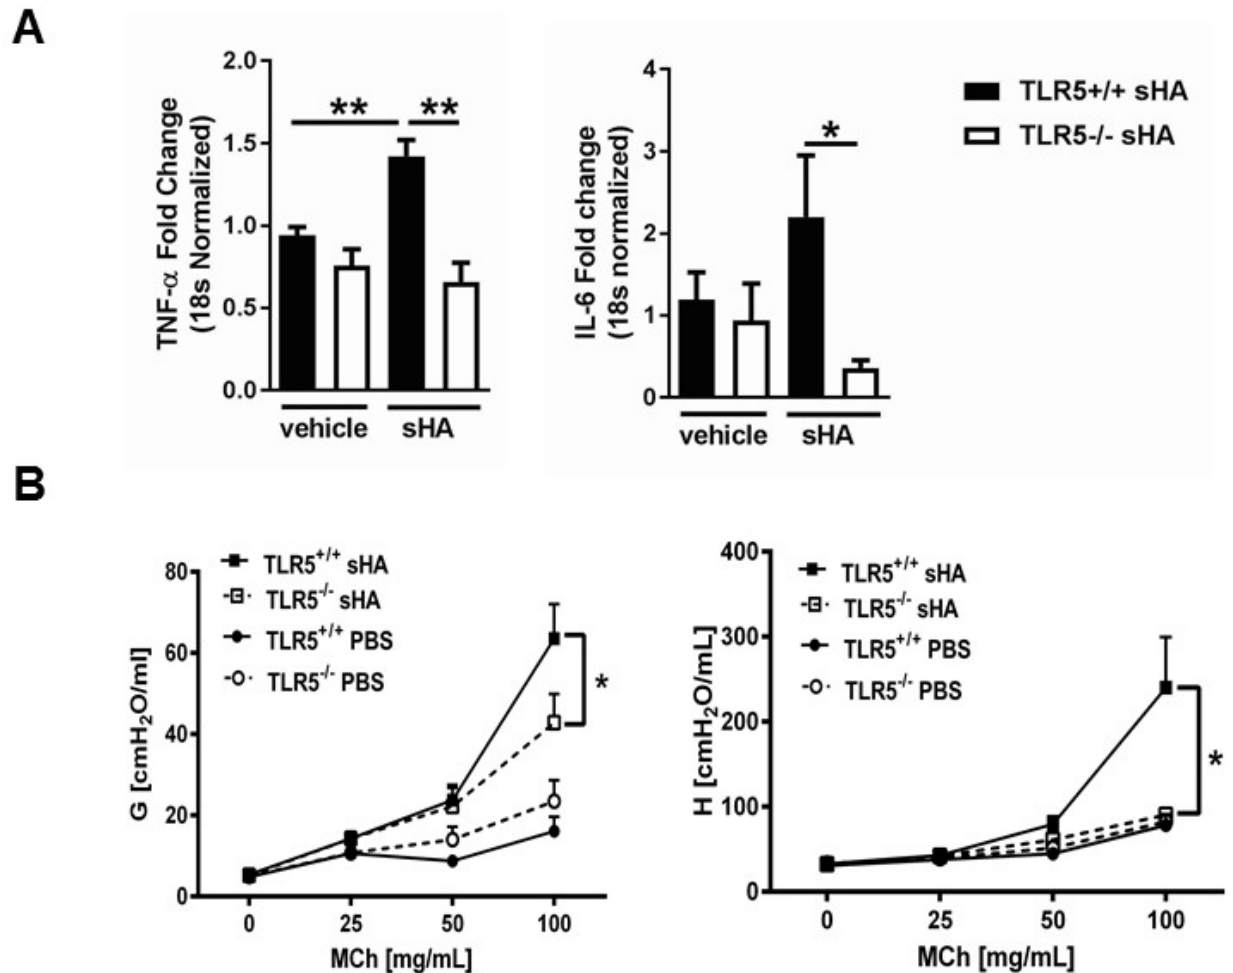

**Figure 3.** TLR5 deficiency ameliorates the *in vivo* inflammatory response to instilled ultrapure short-fragment hyaluronan (sHA). **(A)** Real time quantitative PCR gene expression of TNF- $\alpha$  and IL-6 in the lung tissues of *Tlr5*-deficient (TLR5<sup>-/-</sup>) or *Tlr5*-competent (TLR5<sup>+/+</sup>) mice 6 hours after exposure to vehicle (PBS) or 50  $\mu$ l of 3 mg/ml short fragment HA. n = 5 for TLR5<sup>-/-</sup>-PBS and TLR5<sup>-/-</sup>-sHA and n = 6 for TLR5<sup>+/+</sup>-PBS and TLR5<sup>+/+</sup>-sHA. Experiment repeated once. **(B)** Airway physiology measurement (tissue damping G and tissue elastance H) to indicated doses of methacholine challenge measured with flexiVent 2 hours after exposure to vehicle (PBS) or 2 mg/ml sHA. n = 5 for TLR5<sup>-/-</sup>-PBS and TLR5<sup>-/-</sup>-sHA and n = 6 for TLR5<sup>+/+</sup>-PBS and TLR5<sup>+/+</sup>-sHA, experiment repeated twice. Data are represented as mean  $\pm$  s.e.m. and were analyzed by unpaired t test with Welch's correction \* P<0.05 and \*\* P<0.01 between TLR5<sup>+/+</sup> and TLR5<sup>-/-</sup> mice.

107 analysis of the TLR5 effects on TLR4 signaling. We analyzed gene expression patterns using the  
 108 NanoString© platform ([www.nanostring.com](http://www.nanostring.com)) and utilizing the Mouse Innate Immunity Panel



109 Codeset (Ns\_Mm\_Myeloid\_v2.0) and focused specifically on 242 genes that were more than 2-  
110 fold upregulated after LPS exposure (**Supplementary Table 1 and Supplementary Figure 2**)  
111 and sorted them according to magnitude of TLR5 effect. We showed that the presence or absence  
112 of functional TLR5 is associated with differential regulation of immune genes in this panel.  
113 Interestingly, there was a linear correlation between the magnitude of the TLR5 effect and the  
114 proportion of genes that are either published or predicted to be downstream of the NFκB pathway  
115 (**Supplementary Figure 2C**): among the genes that were 70-90% upregulated in *Tlr5*-sufficient  
116 mice compared to *Tlr5*-deficient mice, almost 90% were in the NFκB pathway, while this  
117 proportion fell to 50% among the genes that were no different between genotypes. ( $R^2=0.89$ ,  
118  $p=0.0013$ ). This suggested to us that TLR5 may preferentially impact gene expression  
119 downstream of MyD88 activation. In aggregate, these results support that TLR5 promotes TLR4  
120 signaling in several models of TLR4 activation through pathogen- or danger-associated molecular  
121 patterns (PAMPs or DAMPs, i.e. LPS or hyaluronan respectively) and promotes TLR4-mediated  
122 inflammation and airway hyperresponsiveness *in vivo*.

123

#### 124 **Genetic TLR5 deficiency in humans impacts TLR4 signaling *in vitro* and *ex vivo*.**

125 We then investigated the effect of TLR5 in human TLR4 signaling. In humans, a dominant-  
126 negative *TLR5* single nucleotide polymorphism (SNP) (rs5744168, *TLR5*<sup>392STOP</sup>) (29) is found with  
127 a prevalence of 8-10% in Caucasians and 3% in African Americans. We hypothesized that carriers  
128 of this SNP may have reduced TLR4-mediated inflammation. We used the Environmental  
129 Polymorphisms Registry (35), a NIEHS-supported cohort, to recruit carriers of this allele, as well  
130 as “wildtype” controls. Others have reported that whole blood from rs5744168 minor-allele carriers  
131 does not differ in the response to LPS compared to “wildtype” (31), and we confirmed this finding  
132 (**Supplemental Figure 3A**). We believe this happens because whole blood consists of different

133 cell types, which differentially express TLR5, thereby confounding the effect on TLR4 signaling.  
134 We then investigated the effect of this *TLR5* SNP on purified, primary monocyte-derived  
135 macrophages. Macrophages from rs5744168 minor-allele carriers had a decreased response to

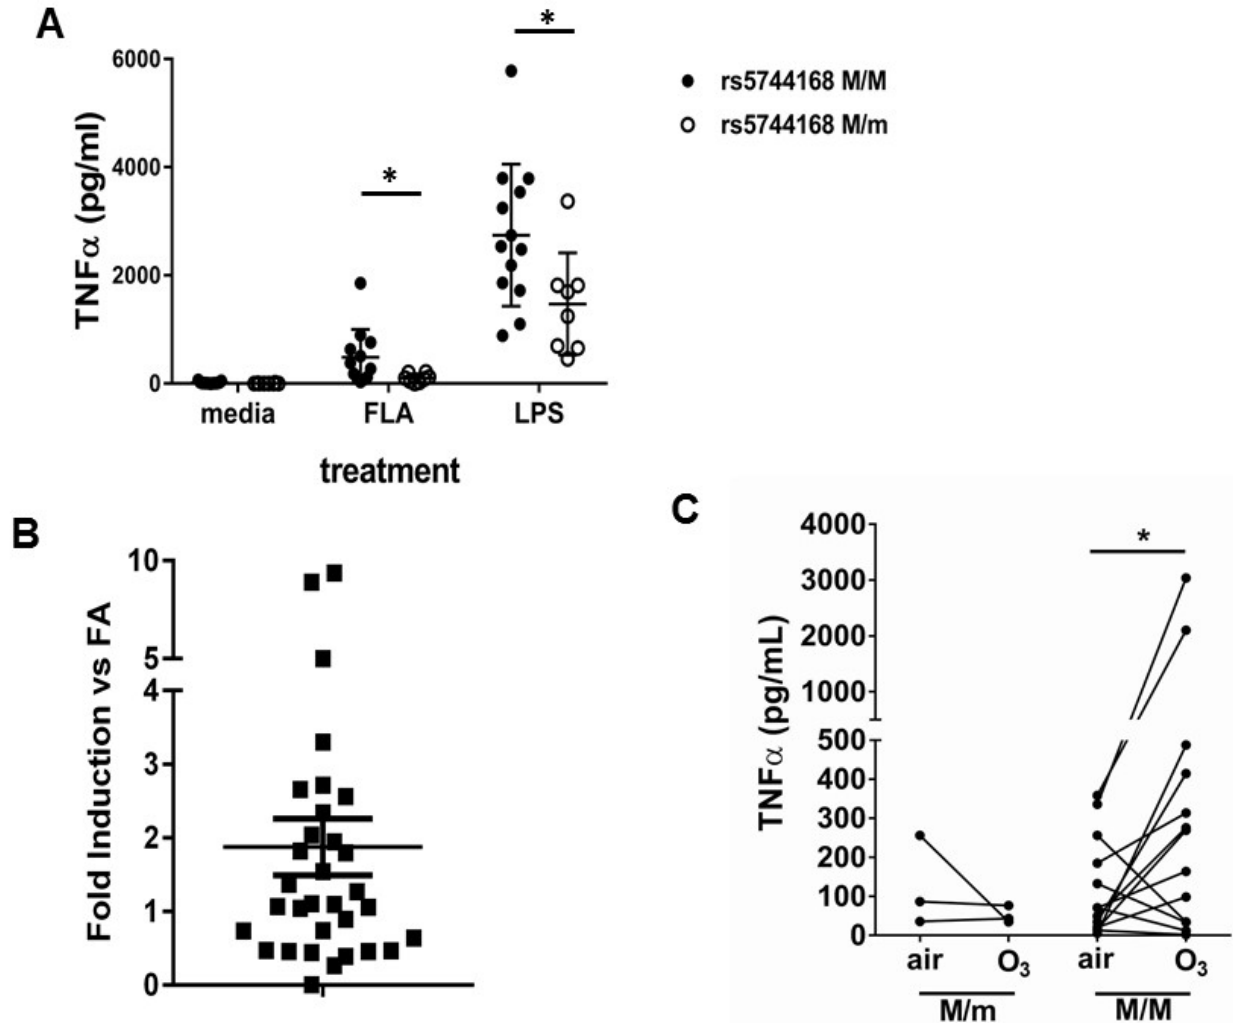

**Figure 4.** TLR5 participates in TLR4-mediated inflammation in humans. **(A)** TNF- $\alpha$  production by peripheral blood monocyte-derived macrophages from human volunteers either homozygous for the major allele (rs5744168 M/M) or carriers of the minor allele (rs5744168 M/m) for the TLR5 single nucleotide polymorphism rs5744168. Cells were exposed to 10 ng/ml ultrapure LPS or 100 ng/ml ultrapure flagellin for 24 hours and TNF- $\alpha$  levels were analyzed by Duoset ELISA kit. Data are represented as mean  $\pm$  standard deviation and analyzed by unpaired t test with Welch's correction. N=7-13 individual subjects. **(B)** TLR5 gene expression in alveolar macrophages from human volunteers exposed to 200 ppb O<sub>3</sub> for 135 minutes. N=32 individual subjects. Data are presented as individual values with mean  $\pm$  s.e.m. and was analyzed by Wilcoxon pairwise signed rank test. **(C)** *Ex-vivo* TNF- $\alpha$  production by human alveolar macrophages after exposure to air or O<sub>3</sub> n=3 minor rs5744168 allele carriers and 20 major allele carriers. Data are represented as individual values and trends and analyzed by Wilcoxon matched-pairs signed rank test. \* P<0.05

136 flagellin and ultrapure LPS, but not Pam3CSK4 (**Fig. 4A and Supplemental Figure 3B**), thus

137 confirming that human *TLR5* genetic variation specifically determines the response to LPS. This  
138 was not due to altered expression of TLR4 or CD14, which was not changed by the rs5744168  
139 genotype (**Supplemental Figure 3C**).

140 We then investigated the effect of TLR5 in O<sub>3</sub>-induced inflammation in healthy human volunteers.  
141 We exposed human volunteers to O<sub>3</sub>, and isolated alveolar macrophages through bronchoscopy  
142 24 hours after exposure, which represents the peak of O<sub>3</sub>-induced inflammation and symptoms  
143 in humans. *TLR5* expression was modestly increased in alveolar macrophages of human  
144 volunteers after O<sub>3</sub> exposure (**Fig. 4B**, p=0.05 by Wilcoxon pairwise signed rank test). There was  
145 no association between *TLR5* expression and *TLR4* expression after O<sub>3</sub> exposure. We found, that  
146 *TNFα* expression by alveolar macrophages after O<sub>3</sub> exposure was not increased in any of the  
147 *TLR5*-deficient individuals (rs5744168 minor-allele carriers), while it was increased in wildtype-  
148 allele carriers (**Fig. 4C and Supplementary Fig.3D**).

149

#### 150 **TLR5 modulates TLR4-dependent signaling.**

151 To investigate the mechanistic role for TLR5 in the response to LPS-induced TLR4 activation, we  
152 then compared primary bone marrow derived macrophages (BMDM) from *Tlr5*-deficient and -  
153 sufficient mice. *Tlr5*-deficient BMDM had significantly decreased expression of TNFα and IL-6  
154 after ultrapure LPS exposure *in vitro*, by an average of 30-50% (**Fig. 5A**). To ensure that the  
155 altered response was not due to LPS contaminants despite the ultrapure preparation, we also  
156 assayed *Tlr4*-deficient BMDM and saw no response to ultrapure LPS (**Fig. 5A**). The effect of *Tlr5*-  
157 deficiency was also observed when using other sources of Tlr4 activation, such as  
158 Monophosphoryl Lipid A (**Supplementary Fig. 4A**). To ascertain that our observation was not  
159 due to an off-target effect of genetic *Tlr5* ablation on macrophage biology, we used RAW264.7  
160 cells, a murine macrophage cell line, which are naturally deficient in *Tlr5* (36). We transfected

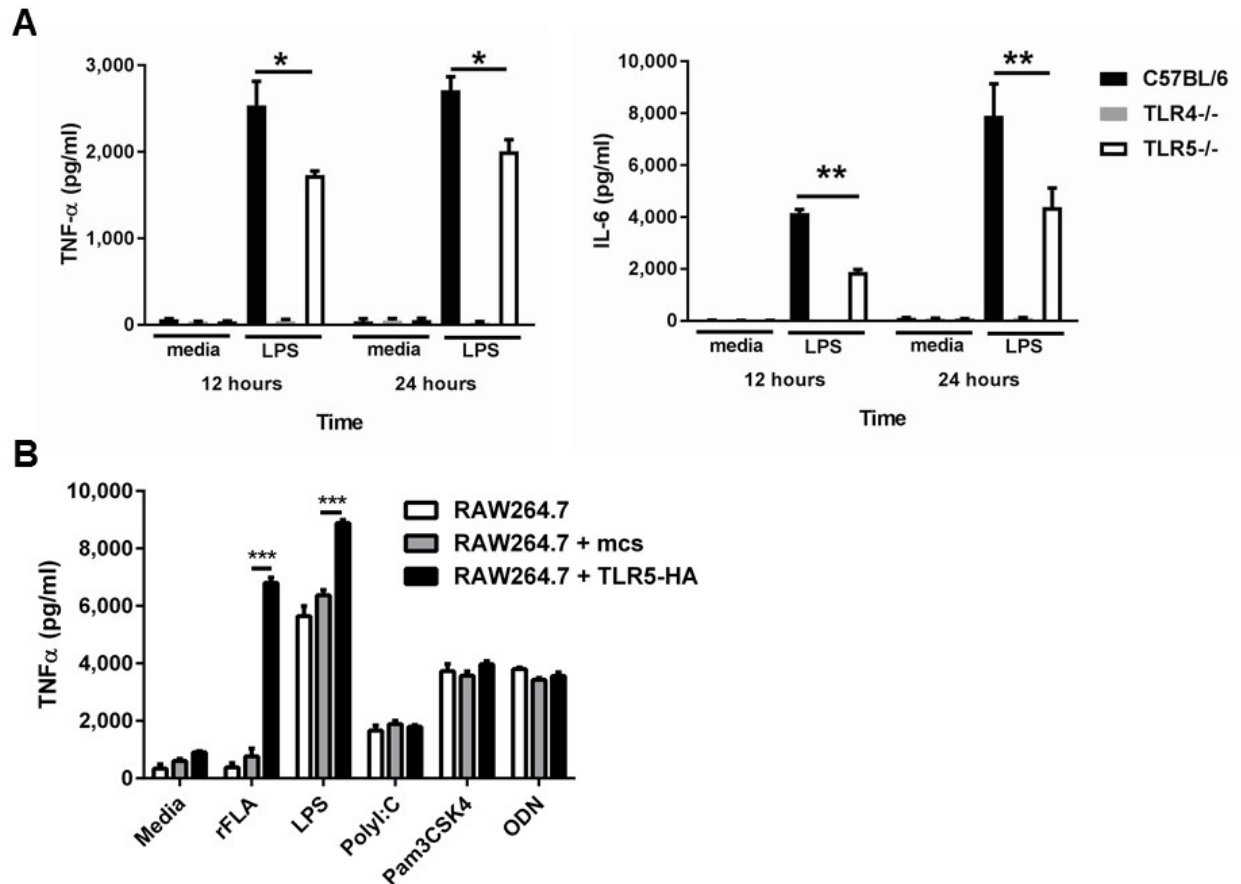

**Figure 5.** Deficiency of TLR5 reduces ultrapure LPS induced inflammatory cytokine production. **(A)** TNF $\alpha$  and IL-6 production by BMDM from *Tlr5*-deficient (TLR5<sup>-/-</sup>), *Tlr4*-deficient (TLR4<sup>-/-</sup>) and wild-type (C57BL/6) mice after 10 ng/mL ultrapure LPS or vehicle (media) exposure for 12 or 24 hours. N=8 per group, experiment repeated at least 5 times. **(B)** TNF- $\alpha$  secretion by non-transfected (RAW264.7), empty construct transfected (RAW264.7 + mcs) or hemagglutinin-tagged TLR5 construct (TLR5-HA) transfected cells (RAW264.7 + TLR5-HA) after vehicle (media) or TLR5, TLR4, TLR3, TLR2 and TLR9 agonists (100 ng/mL recombinant ultrapure flagellin (rFLA), 10 ng/ml LPS, 10  $\mu$ g/ml PolyI:C, 1  $\mu$ g/ml Pam3CSK4, 1  $\mu$ M ODN). N=8 per group, experiment repeated twice. Data are represented as mean  $\pm$  s.e.m. and were analyzed by two-way analysis of variance (ANOVA) followed by Tukey's post hoc test. \* P<0.05, \*\* P<0.01, \*\*\* P<0.001.

161 these cells with a murine *Tlr5* construct, or empty vector, and noted that the *Tlr5*-transfected cells  
 162 had significantly higher TNF $\alpha$  expression in response to ultrapure LPS (and the TLR5 ligand  
 163 flagellin, as expected). The TLR5-dependent effect was specific to LPS exposure, as responses  
 164 to poly(I:C) (TLR3 ligand), Pam3CSK4 (TLR2 ligand), and ODN (TLR9 ligand) were not affected  
 165 by the presence of TLR5 (**Fig. 5B**).

166

167 **TLR5 engages with MyD88 after LPS exposure and biases TLR4 signaling towards the**  
 168 **MyD88 pathway.**

169 We then interrogated the effect of TLR5 on TLR4 signaling. TLR4 signals through both MyD88  
 170 and TRIF pathways, whereas TLR5 signals through MyD88 only (11). We therefore hypothesized  
 171 that TLR5 may bias the signaling response towards the MyD88 pathway. We found that, in primary  
 172 murine BMDMs, MyD88 co-immunoprecipitated with TLR5 after ultrapure LPS exposure (**Fig.**  
 173 **6A**). This association was directly dependent upon TLR4 activation, since it was not observed in

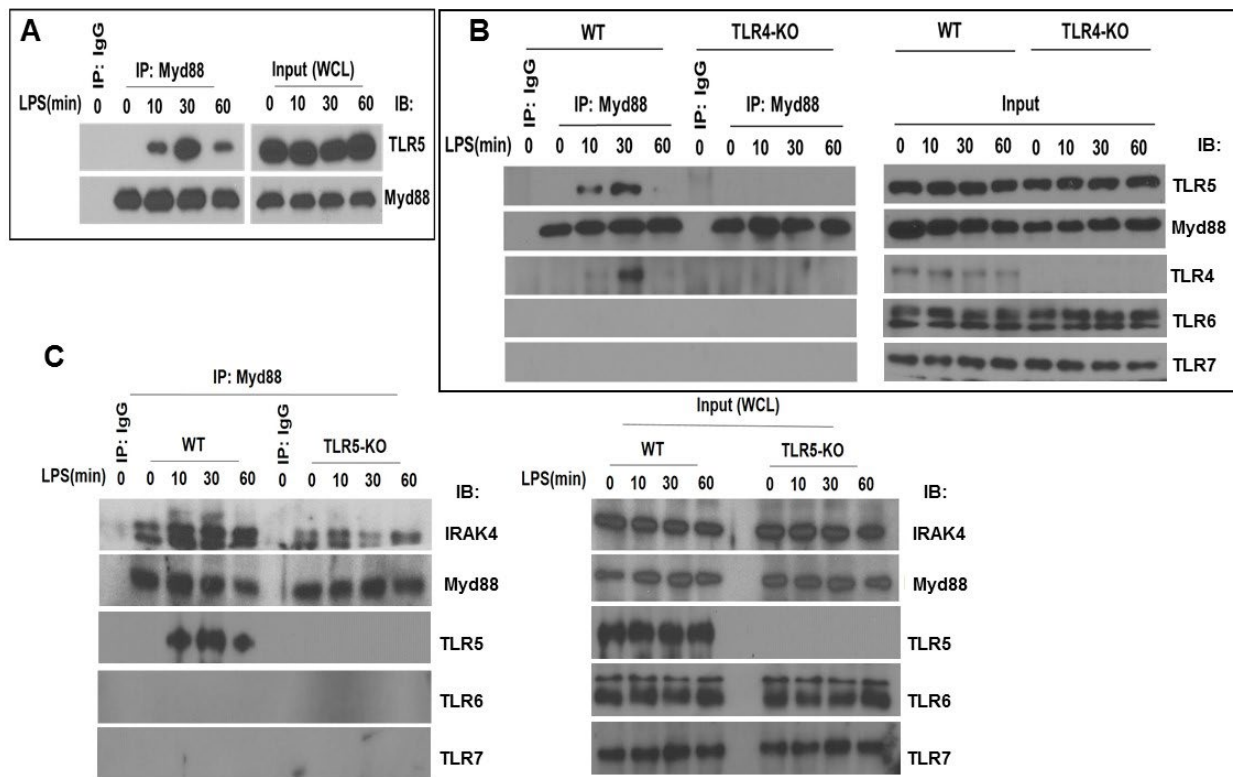

**Figure 6.** TLR5 engages with MyD88 and promotes Myddosome assembly after TLR4 activation. **(A)** Co-immunoprecipitation of TLR5 with Myd88 in BMDM from C57BL/6J mice after 100 ng/mL LPS exposure for indicated time points. n = 7, experiment was repeated twice. **(B)** immunoprecipitation of TLR5 with Myd88 in BMDM from *Tlr4*-deficient (TLR4-KO) or *Tlr4*-competent (C57BL/6, wildtype WT) mice after 100 ng/mL LPS exposure for indicated time points. Representative of 3 separate experiments. **(C)** Immunoprecipitation of IRAK4 with Myd88 in BMDM from *Tlr5*-deficient (TLR5 KO) or *Tlr5*-competent (C57BL/6, wildtype WT) mice after 100 ng/mL LPS exposure for indicated time points.

174 *Tlr4*-deficient primary BMDM (**Fig. 6B**). TLR4, as expected, also immunoprecipitated with MyD88  
 175 after LPS exposure (**Fig. 6B**). Furthermore, the association of MyD88 with TLR4 and TLR5 was

176 specific, since other TLR like TLR6 and TLR7 did not immunoprecipitate with MyD88 after LPS  
 177 exposure (**Fig. 6B, 6C**). MyD88 signaling occurs through the complexing of Myd88 with IRAK-4  
 178 which stabilizes formation of the so-called Myddosome (37). *Tlr5*-deficient BMDM had decreased  
 179 immunoprecipitation of IRAK-4 with MyD88 (**Fig. 6C**). There was also significant reduction in the  
 180 phosphorylation of IKK $\alpha/\beta$ , I $\kappa$ B, p65, JNK1/2 and ERK1/2 in *Tlr5*-deficient BMDMs compared with  
 181 wildtype cells during early activation (**Fig. 7A,B, Supplementary Fig. 4B**), which is MyD88- but  
 182 not TRIF-dependent (38, 39). Nuclear IRF3 (a specific readout of TRIF-dependent signaling (40))

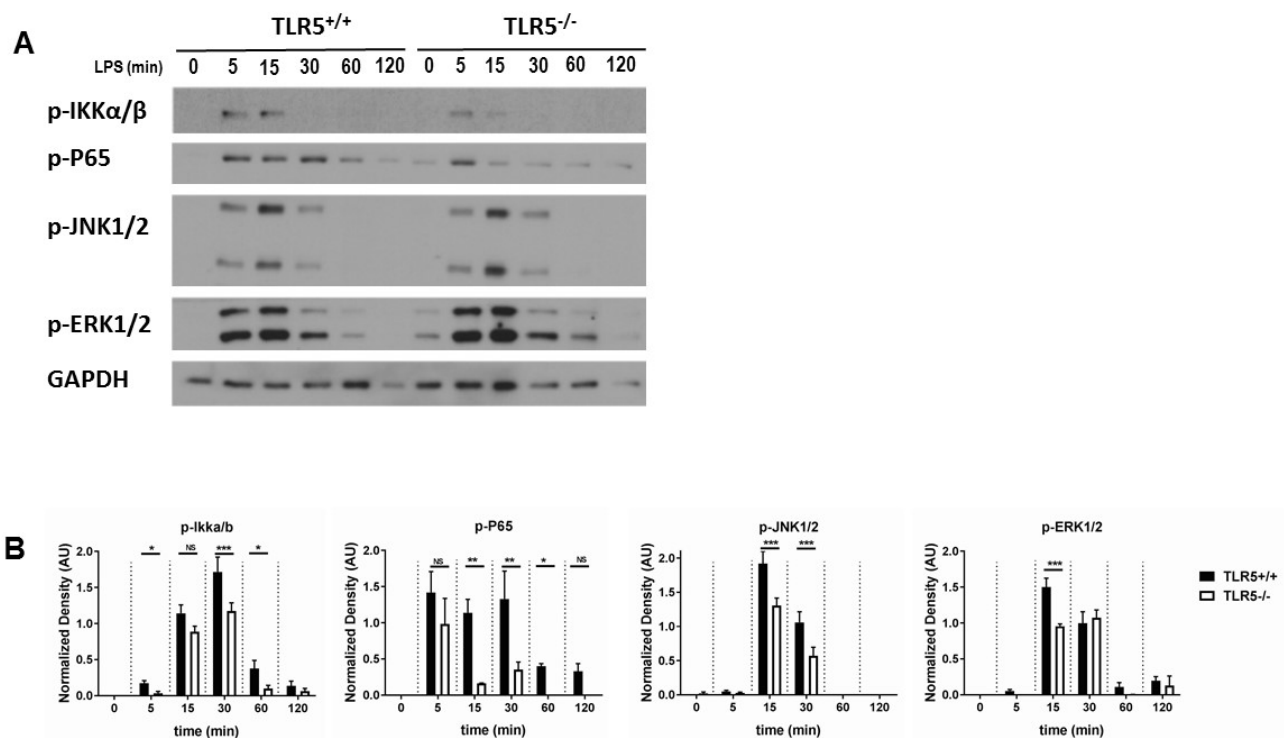

**Figure 7.** TLR5 promotes MyD88 downstream signaling. **(A)** Western blot analysis of p-P65, p-IKK $\alpha/\beta$ , p-JNK1/2 and p-ERK1/2 after exposure to 100 ng/mL ultrapure LPS exposure in BMDMs from *Tlr5*-competent (TLR5<sup>+/+</sup>) and *Tlr5*-deficient (TLR5<sup>-/-</sup>) mice. **(B)** Quantification of densitometric analysis of 3 separate blots similar to (3A). Data are represented as mean  $\pm$  s.e.m. and were analyzed by repeated unpaired t test with Holm-Sidak correction. NS=not significant, \* P<0.05, \*\* P<0.01, \*\*\* P<0.001.

183 was not affected in *Tlr5*-deficient (**Supplementary Fig. 4C**). In aggregate, these results suggest  
 184 that TLR5 directly interacts with MyD88 after LPS exposure and enhances MyD88-dependent  
 185 TLR4 signaling by promoting efficient assembly of Myddosome.

186

187 **TLR5 is part of the TLR4 signaling complex.**

188 We then investigated whether TLR5 participates directly in the TLR4 signaling complex, or  
189 whether it affects TLR4 signaling indirectly. We first evaluated whether TLR5 affects TLR4 cell  
190 surface expression and trafficking using bone marrow-derived macrophages (BMDM) from  
191 genetically deficient or wild-type mice. There were no differences in basal levels of cell surface  
192 TLR4 or CD14 between *Tlr5*-deficient and –sufficient BMDM, nor in LPS-induced internalization  
193 of TLR4 (**Supplementary Fig. 5A-D**). Because we were unable to find commercially available  
194 validated antibodies against TLR4 that could be used in co-immunoprecipitation experiments, we  
195 utilized an induced expression system using tagged TLR4 and TLR5 in HEK293 cells and found  
196 that TLR4 and TLR5 reciprocally co-immunoprecipitated in transfected HEK293 cells (**Fig. 8A**).  
197 We then overexpressed TLR4 and TLR5 in HeLa cells and confirmed their interaction through a

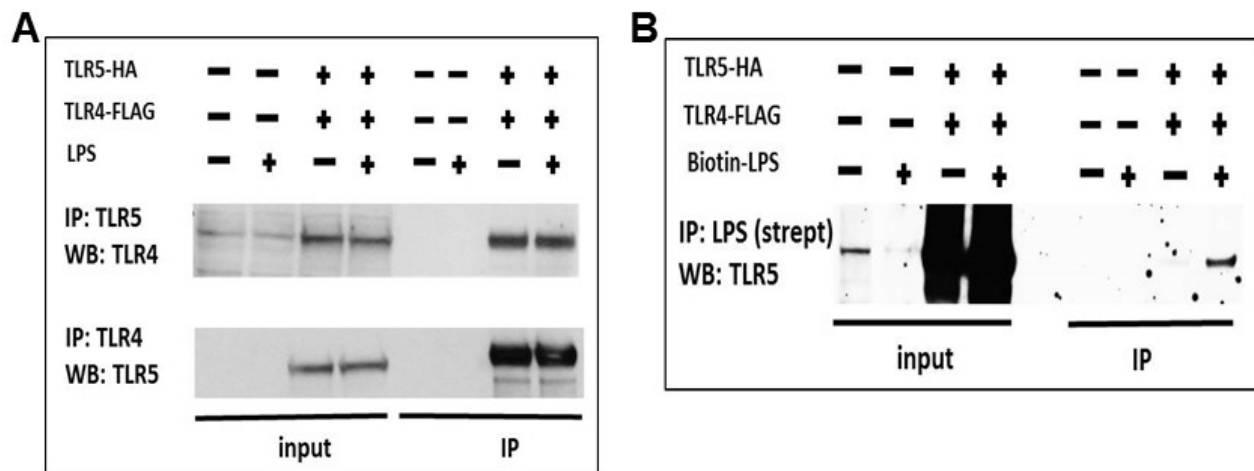

**Figure 8.** TLR5 participates in TLR4 signaling complex. **(A)** Co-immunoprecipitation of hemagglutinin-tagged TLR5 (TLR5-HA) and FLAG-tagged TLR4 (TLR4-FLAG) in HEK293 cells after 100 ng/mL ultrapure LPS exposure. **(B)** Immunoprecipitation of TLR5 with biotinylated ultrapure LPS (Biotin-LPS) in TLR5-HA and TLR4-FLAG transfected HEK293 cells after 100 ng/mL Biotin-LPS exposure for 15 minutes. Representative of 2 separate experiments.

198 Proximity Ligation Assay (**Supplementary Fig. 5E**). Furthermore, we exposed TLR5-  
199 hemagglutinin tagged expressing RAW264.7 cells to biotin-tagged LPS, and (after thoroughly  
200 washing the cells) could co-precipitate TLR5 with LPS (**Fig. 8B**). These results suggest that TLR5

201 directly participates in the TLR4 signaling complex after LPS exposure, and, in aggregate, support  
202 a functional interaction of TLR5 with TLR4 in the response to environmental injury.



## 203 Discussion

204 The important novel finding from our work, is that TLR5 heteromerization with TLR4 modulates  
205 canonical TLR4 signaling, and biases TLR4 signaling towards MyD88. Recent evidence highlights  
206 the role of molecules of the TLR4 receptor complex in modulating TLR4 signaling. For example,  
207 elegant work has demonstrated that CD14, which is necessary for LPS binding to TLR4, also  
208 controls TLR4 endocytosis after LPS ligation, and thus is necessary for TRIF signaling, which is  
209 thought to occur in the endosomal compartment (41). Our work further suggests that TLR4  
210 signaling is modulated by the addition of TLR5 to the receptor complex. Unlike CD14, TLR5 does  
211 not appear to regulate LPS-induced internalization of TLR4 (**Supplementary Fig. 5C**). Our  
212 findings rather support a model in which TLR5 selectively promotes TLR4/MyD88 signaling at the  
213 plasma membrane and is not required for CD14 regulation of the TRIF pathway. Importantly, our  
214 work suggests that TLR5 regulation of TLR4 signaling is biologically significant. TLR5-deficient  
215 mice had approx. 30-50% decreased cytokine expression in local and systemic LPS models of  
216 lung inflammation, while airway hyperresponsiveness after ozone or hyaluronan exposure was  
217 significantly reduced, and inflammatory gene induction after hyaluronan exposure was abolished.  
218 It is possible that the “fine-tuning”, MyD88-promoting effects of TLR5 are particularly evident in  
219 lower-grade inflammation such as ozone- or hyaluronan-induced, which explains the larger impact  
220 on TLR5 deficiency on human and murine inflammation after ozone exposure compared to LPS  
221 exposure.

222 Using primary murine macrophages, we demonstrate that, in the physiological state, TLR5 co-  
223 immunoprecipitates with MyD88 after ultrapure LPS exposure, but only in the presence of TLR4.  
224 This indicates that TLR5 is recruited into the Myddosome assembly, along with TLR4, upon TLR4  
225 activation. Indeed, it has been postulated that the ability of the Myddosome to form 7:4 and 8:4  
226 MyD88:IRAK4 stoichiometries is a potential mechanism through which clusters of activated TLR  
227 receptors can be formed and different TLR receptors can be recruited into the same assembly

228 (42). Higher-order assembly of receptor complexes in lipid raft microdomains is likely to be crucial  
229 in the fine-regulation of immune responses (37). Our work suggests that TLR5 may be part of the  
230 higher-order receptor assembly that regulates TLR4 signaling. TLR4 is a promiscuous receptor,  
231 having been found to heterodimerize with TLR2 and TLR6 (17, 18), but the effect of  
232 heteromerization until now has always been to expand the TLR4 ligand spectrum. To our  
233 knowledge, this is the first work to demonstrate that TLR heteromerization may serve to modulate  
234 canonical TLR signaling.

235 A recent paper supported the role of TLR5 in TLR4 signaling, showing similar effects of the  
236 rs5744168 minor allele polymorphism on TNF $\alpha$  and IL-8 expression by human monocytes after  
237 LPS exposure, and also demonstrating that TLR5 does not influence the gene expression of TLR4  
238 (43), as we also show in our Supplemental Figure 5. By contrast, that paper could not confirm  
239 that TLR5 is modifying the NF $\kappa$ B pathway. This apparent discrepancy may be due to different  
240 research methodologies: These authors used gene silencing which only resulted in approx. 50%  
241 reduction of TLR5 expression, as well as reporter cell lines with transfection-induced TLR5  
242 expression, as opposed to our use of primary cells with genetically knocked-out gene function.  
243 Furthermore, the authors of that study did show an effect for TLR5 on NF $\kappa$ B when transfecting  
244 with lower (more physiological) doses of TLR5 DNA (43).

245 In summary, our results suggest a new model of TLR4-TLR5 complex formation in response to  
246 the PAMP LPS or the DAMP hyaluronan (**Fig. 9**). We propose that the hitherto accepted model  
247 of TLR4 signaling through TRIF and MyD88 rather reflects the TLR5-deficient state. In TLR5-  
248 expressing cells, TLR5 participates in a heteromeric higher-order TLR4 receptor complex and  
249 potentiates MyD88 signaling by promoting efficient assembly of the Myddosome. This also  
250 suggests that exposures that induce TLR5 expression, such as DNA injury, p53 activation (21) or  
251 flagellated bacterial infection may in parallel selectively prime the MyD88-dependent pro-  
252 inflammatory response to LPS. Since TLR5 signals through MyD88, in a finite TLR4 receptor pool  
253 the presence of TLR5/TLR4 higher-order complexes would bias TLR4 signaling towards MyD88.  
254 Notably, cell surface expression of TLR4 on immune cells is low (a few hundred or thousand

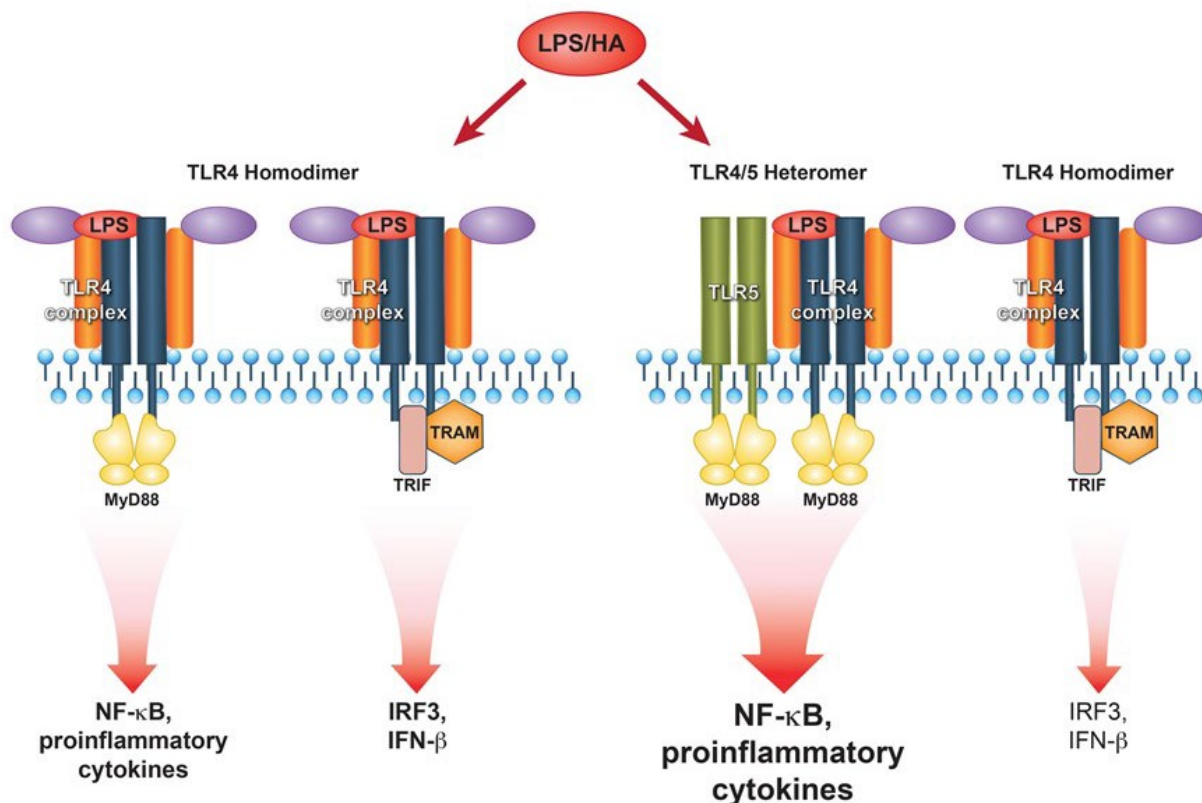

**Figure 9.** Proposed model of TLR5-TLR4 interaction during environmental lung injury. The current model of canonical TLR4 activation rather applies to the TLR5 deficient status (left panel). In the presence of TLR5 (right panel), TLR5 participates in the TLR4 signaling complex, and promotes signaling downstream the MyD88 pathway.

255 molecules per cell) compared to other TLRs (44, 45), supporting that the presence of relatively  
256 few TLR5 receptor molecules may suffice to shift the TLR4 signaling equilibrium towards MyD88.

257 **Methods**

258 **Mice:**

259 C57Bl/7J mice and B6.129S1-*Tlr5<sup>tm1Flv</sup>*/J (TLR5-deficient) mice were purchased from the Jackson  
260 Laboratory (Bar Harbor, ME). The TLR5-deficient allele was generated in the 129S1 genome and  
261 subsequently backcrossed to C57BL/6 before being transferred to the Jackson Laboratory by the  
262 donating investigator. When possible, wildtype littermate control mice were used in our study in  
263 parallel to commercial wildtype C57BL/6J controls. To ensure that our results were not due to  
264 locality-influenced microbiome changes, we repeated experiments in mice that were bred at the  
265 NIEHS vivarium, as well as mice purchased from the Jackson Laboratory and studied within 1  
266 week of arrival. In some experiments, mice received neomycin water to control gut microbiome.  
267 Results were comparable independent of provenance or antibiotic dosing. Mice were given  
268 access to water and chow *ad libitum*, and were maintained at a 12-hour dark-light cycle. No  
269 differences in body weight were observed at the ages studied (6-12 weeks old). All experiments  
270 are approved by the NIEHS Institutional Animal Care and Use Committee.

271

272 **Exposures:**

273 Mice received ultrapure *E.coli* O111:B4 LPS (List Biological Labs, Campbell, CA) (50  $\mu$ l of 1mg/ml  
274 in PBS), or control PBS vehicle only, by oropharyngeal aspiration and were phenotyped 24 hours  
275 later. For systemic LPS exposure, mice received 10 mg/kg LPS or PBS by intraperitoneal injection  
276 and were phenotyped 24 hours later. In other experiments, mice were exposed to 2 ppm ozone  
277 for 3 hours, in a chamber with 20 exchanges/hour, 50-65% relative humidity and a temperature  
278 of 20-25° C as previously described (16) and were phenotyped 24 hours later. Control mice  
279 received filtered air in an identical setup. In other experiments, mice received 50  $\mu$ l of a 3 mg/ml  
280 solution of sonicated, LPS-free, pharmaceutical-grade hyaluronan with an average molecular

281 weight of 100-300 kDa (derived from Healon, Abbott Laboratories, Abbott Park, IL) or PBS vehicle  
282 by retropharyngeal aspiration, and were phenotyped 2 hours later.

283

#### 284 **Airway physiology measurements:**

285 Airway responsiveness to 25-100 mg/ml methacholine (MCh; Sigma) was measured 24 hours  
286 following O<sub>3</sub> or 2 hours following hyaluronan challenge. Briefly, mice were anesthetized with  
287 urethane (2 g/kg; Sigma), tracheotomized with a tracheal cannula (Harvard Apparatus) with Luer  
288 adapter, and mechanically ventilated on a 42 °C water-heated pad at a rate of 150 breaths/min,  
289 a tidal volume of 10 ml/kg and a positive end-expiratory pressure (PEEP) of 3 cm H<sub>2</sub>O with a  
290 computer-controlled small animal ventilator (FlexiVent, Scireq, Montreal, Canada). To block  
291 spontaneous breathing, mice were given pancuronium bromide i.p. (0.8 mg/kg; Sigma-Aldrich)  
292 5min prior to assessment of airway responses. To measure airway responsiveness, a single-  
293 frequency forced oscillation waveform, followed by a broadband forced oscillation waveform  
294 (matched to the animal breathing frequency) were applied using the Flexiware 7.6 software  
295 default mouse inhaled dose-response script. The resulting pressure, volume, and flow signals  
296 were fit to either the Single Compartment or Constant Phase model of the lung to obtain total  
297 respiratory system resistance ( $R_{rs}$ ) and elastance ( $E_{rs}$ ) or Newtonian resistance ( $R_n$ , generally  
298 understood as proximal airway resistance), tissue damping ( $G$ , generally understood as  
299 peripheral tissue resistance), and tissue elastance ( $H$ ), respectively(46). The peak response at  
300 each dose was averaged and graphed along with the average baseline measurement for each  
301 group.

302

#### 303 **Proximity Ligation Assays (PLA, Duolink)**

304 TLR4-FLAG M2 or MyD88-V5 and TLR5-HA were overexpressed in HeLa cells grown on glass  
305 coverslips. 24h post-transfection the cells were fixed with 4% paraformaldehyde (PFA) for 10  
306 minutes at room temperature (RT) and blocked with 10% normal goat serum for 1h at RT. The

307 cells were next permeabilized with 0.1% TritonX-100 in goat serum for 15 minutes at RT and  
308 incubated with primary antibodies (dilution 1:1000) against epitope-tags overnight: rabbit anti-  
309 FLAG M2 (Cell Signaling), mouse anti-V5 (Invitrogen) and mouse anti-HA (Sigma). Duolink,  
310 based on in situ proximity ligation assay (PLA), was performed according to manufacturer  
311 instructions (Sigma).

312

### 313 **Bone Marrow Derived Macrophage (BMDM)**

314 Bone marrow was collected from tibias and femurs of wildtype *and* *Tlr5*-deficient mice and cell  
315 single preparations were made. Growth media for maturation of BMDM consisted of DMEM-F12  
316 containing 10mM L-glutamine, 10% embryonic stem cell qualified fetal bovine serum, 1%  
317 antibiotic and antifungal mix and 30 ng/mL murine M-CSF. Cells were cultivated in an incubator  
318 at 37°C, 5% CO<sub>2</sub> for up to 7 days with media change every 48 hours after first media change 72  
319 hours after plating. *Tlr5*-deficient BMDM were evaluated for responsiveness to flagellin and were  
320 found to be unresponsive (Supplementary Fig. 6)

321

### 322 **Flow Cytometry**

323 In order to access cell surface expression of TLR4, Wildtype, *Tlr4*-deficient or *Tlr5*-deficient  
324 BMDM were harvested, washed with PBS and were exposed to ultrapure LPS for 0,15,30, 60 or  
325 90 minutes. Cells were washed with cold PBS and gently lifted from the culture dishes using a  
326 cell lifter. Cells numbers were estimated and cells were aliquoted in 1 x 10<sup>6</sup> cells per tube in the  
327 FACS buffer (0.5% BSA, 0.1% NaN<sub>3</sub>, and 2mM EDTA in PBS). Cells were blocked for 20 minutes  
328 on ice in a blocking solution (FACS buffer, 10% species specific serum, and 1% FCR block). Cells  
329 were stained using APC anti-mouse CD284 (TLR4) Antibody (clone SA15-21), anti-CD14  
330 Antibody (Biolegend) or isotype controls for 30 minutes on ice. Cells were washed two times with  
331 1mL FACS buffer after staining, suspended in 500 uL FACS buffer containing 1mg/mL propidium  
332 iodide (to identify dead cells) and analyzed on a BD FACSAria II equipment.

333

### 334 **Western Blotting**

335 Wildtype or *Tlr5*-deficient BMDM were harvested, washed once with cold PBS, and lysed for 30  
336 minutes at 4°C in 1% TritonX-100, 20 mM HEPES (pH 7.4), 150 mM NaCl, 1.5 mM MgCl<sub>2</sub>, 2mM  
337 EGTA, protease and phosphatase inhibitors (Roche). Cellular debris was removed by  
338 centrifugation at 16,000rcf for 10 min. For immunoblotting, cell extracts were fractionated by SDS-  
339 PAGE and transferred to Immobilon-P transfer membranes (Millipore), using either a wet transfer  
340 apparatus (Bio-Rad) or with a dry transfer system (iBlot) from Invitrogen. Immunoblot analysis  
341 was performed, and the bands were visualized with HRP-coupled goat anti-rabbit, goat anti  
342 mouse, or donkey anti-goat Ig as appropriate (Rockland), using the ECL Western blotting  
343 detection system (GE Healthcare). Protein levels were equilibrated with the Protein Assay  
344 Reagent (Bio-Rad).

345

### 346 **Co-immunoprecipitation**

347 For coimmunoprecipitations, cells were harvested, washed once with cold PBS, and lysed in a  
348 TritonX-100-containing buffer (0.5% TritonX-100, 20 mM HEPES (pH 7.4), 150 mM NaCl, 1.5 mM  
349 MgCl<sub>2</sub>, 2mM EGTA, protease and phosphatase inhibitors (Roche). Cell extracts were incubated  
350 with 1 µg of Ab (anti-HA, Sigma) or normal IgG (negative control) for 2 h, followed by incubation  
351 for 12 h with 30 µl of protein G-Sepharose beads (prewashed and resuspended in lysis buffer at  
352 a 1:1 ratio). After incubations, the beads were washed four times with lysis buffer, separated by  
353 SDS-PAGE, and analyzed by immunoblotting. For TLR4, TLR5, TLR6 and TLR7 antibodies,  
354 blocking agent was 5% BSA and antibody dilution was 1:10,000. For Myd88 antibody, blocking  
355 agent was 5% milk and antibody dilution was 1:1,000. Antibodies used were TLR4: Cat#482300  
356 (Life Technology). TLR5: Cat#PA1-41139 (Invitrogen), TLR6: Cat#AF1533 (R&D Systems),  
357 TLR7: Cat# MAB7156 (R&D Systems), Myd88: Cat#4283 (cell signaling)

358



## 359 **ELISA Assays**

360 ELISA assay was performed using either R and D Duoset assay kits or Luminex multiplex assays  
361 according to manufacturer recommendations.

362

## 363 **Human Ozone Exposure, Alveolar Macrophage Isolation, Culture**

364 The complete details of the human exposure studies and the subject characteristics were  
365 previously published(47). After obtaining informed consent through a Duke University Institutional  
366 Review Board approved protocol, healthy human subjects were exposed to filtered air and ozone  
367 (200 parts per billion) in a crossover challenge designed study. Exposures were for 135 minutes,  
368 during which participants alternated between resting and walking on a treadmill at 2-3 mph to  
369 mimic an individual performing mildly strenuous activity under ambient conditions. Ozone was  
370 created from a 100% O<sub>2</sub> source by cold plasma corona discharge (Ozotech, Yreka CA), and  
371 mixed with filtered air before addition to chamber and was continuously monitored. The order of  
372 filtered air or ozone exposure were randomized for every participant, with at least a 21-day  
373 washout period. Approximately 20 hours after exposure, participants underwent a flexible  
374 bronchoscopy with bronchoalveolar lavage. Following bronchial alveolar lavage, human alveolar  
375 macrophages were isolated. After red cell lysis and counting, the macrophages were re-  
376 suspended in media (RPMI1640 with 10% heat-inactivated FBS, 100 units/ml penicillin, and 100  
377 µg/ml streptomycin) and plated in a 24 well plate at a density of 200,000 cells per well. The cells  
378 were maintained in a CO<sub>2</sub> incubator at 37° C for 2 hours. After 2 hours, the media was replaced  
379 to remove non-adherent cells and then 2 hours later, the supernatant was collected and the cells  
380 were harvested for RNA. RNA extraction was performed using the Fourth Edition Qiagen Protocol  
381 (Qiagen, RNeasy Mini Kit, 4th edition, Valencia, CA), followed by DNase treatment (DNase I,  
382 Ambion, Austin, TX) and cDNA synthesis (BioRad). RT-PCR was performed on an ABI SDS 7500  
383 (Applied Biosystems) using SYBR Green Reagent (Clontec Laboratories Inc., Mountain View,  
384 CA). TLR5 expression was determined in comparison to the 18-s RNA housekeeping gene and

385 the data reported as fold change over the matched filter air sample for each individual subject.  
386 The following primers were used for RT-PCR: 18s (Fwd: GTAACCCGTTGAACCCATT, Rev:  
387 CCATCCAATCGGTAGTAGCG); TLR4 (Fwd: GGCCATTGCTGCCAACAT, Rev: CAACAATCA  
388 CCTTTCGGCTTTT), TLR5 (Fwd: TGTATGCACTGTCACTCTGACTCTGT, Rev:  
389 AGCCCCGGAACCTTGTGACT). Human TNF- $\alpha$  was measured from the cell supernatants via  
390 ELISA (MAX Standard Set kit, BioLegend) according to manufactures instructions. Readings were  
391 taken using BMG LABTECH Omega (Software Version 1.20). In a second study, participants  
392 were invited according to their rs5744168 genotype. Peripheral blood was drawn, and monocyte-  
393 derived macrophages isolated after 7 days in culture and exposed to ultrapure LPS or flagellin as  
394 indicated.

395

### 396 **Statistical Analyses**

397 Data are represented as mean  $\pm$  s.e.m. and were analyzed depending on experimental design by  
398 either analysis of variance (one-way or two-way ANOVA) followed by Tukey's post hoc test or by  
399 unpaired t test with Welch's or Holm-Sidak correction as appropriate. Tlr5 gene expression and  
400 TNF- $\alpha$  production data from ozone expose human volunteer macrophages is presented as  
401 individual values and analyzed by Wilcoxon pairwise signed rank test.

### 402 **Study approval**

403 All clinical studies described in this work were approved by the Institutional Review Boards of the  
404 NIEHS and Duke University respectively. Written informed consent was received from all  
405 participants prior to inclusion in the described studies.

406

407 **Author Contributions**

408 SG and SH conceived the work, designed experiments, analyzed data and wrote the manuscript  
409 with input from all co-authors. SH, CJG, JS, XM, VPS, JMC, KB, CL, WQ, JA, KMG and RMT  
410 performed experiments and contributed in data analysis as well manuscript writing. WMF, RMT,  
411 JWH, XL, MBF contributed in manuscript writing and provided critical input for improving the  
412 study. All authors read and approved final version of the manuscript.

413 Salik Hussain, Collin G Johnson and Joseph Scirba contributed equally in performing  
414 experiments.

415 **Acknowledgements**

416 Authors thanks Kevin Katen, James Ward, Rickie Fannin and Ligon Perrow for their excellent  
417 technical assistance.

418

## 419 References

- 420 1. Redd SC. Asthma in the United States: burden and current theories. *Environmental health*  
421 *perspectives*. 2002;110 Suppl 4:557-60.
- 422 2. Kochanek KD, Xu J, Murphy SL, Minino AM, and Kung HC. Deaths: final data for 2009.  
423 *National vital statistics reports : from the Centers for Disease Control and Prevention,*  
424 *National Center for Health Statistics, National Vital Statistics System*. 2011;60(3):1-116.
- 425 3. Ford ES, Murphy LB, Khavjou O, Giles WH, Holt JB, and Croft JB. Total and state-specific  
426 medical and absenteeism costs of COPD among adults aged  $\geq 18$  years in the United  
427 States for 2010 and projections through 2020. *Chest*. 2015;147(1):31-45.
- 428 4. Bell ML, McDermott A, Zeger SL, Samet JM, and Dominici F. Ozone and short-term  
429 mortality in 95 US urban communities, 1987-2000. *Jama*. 2004;292(19):2372-8.
- 430 5. Katsouyanni K, Zmirou D, Spix C, Sunyer J, Schouten JP, Ponka A, et al. Short-term  
431 effects of air pollution on health: a European approach using epidemiological time-series  
432 data. The APHEA project: background, objectives, design. *The European respiratory*  
433 *journal*. 1995;8(6):1030-8.
- 434 6. Hubbell BJ, Hallberg A, McCubbin DR, and Post E. Health-related benefits of attaining the  
435 8-hr ozone standard. *Environmental health perspectives*. 2005;113(1):73-82.
- 436 7. Thorne PS, Kulhankova K, Yin M, Cohn R, Arbes SJ, Jr., and Zeldin DC. Endotoxin  
437 exposure is a risk factor for asthma: the national survey of endotoxin in United States  
438 housing. *American journal of respiratory and critical care medicine*. 2005;172(11):1371-7.  
439 Epub 2005 Sep 1.
- 440 8. Levy JI, Chemerynski SM, and Sarnat JA. Ozone exposure and mortality: an empiric  
441 bayes metaregression analysis. *Epidemiology*. 2005;16(4):458-68.
- 442 9. Miller RL, and Peden DB. Environmental effects on immune responses in patients with  
443 atopy and asthma. *The Journal of allergy and clinical immunology*. 2014;134(5):1001-8.
- 444 10. Garantziotis S, and Schwartz DA. Ecogenomics of respiratory diseases of public health  
445 significance. *Annual review of public health*. 2010;31:37-51 1 p following
- 446 11. Kawai T, and Akira S. The role of pattern-recognition receptors in innate immunity: update  
447 on Toll-like receptors. *Nature immunology*. 2010;11(5):373-84.
- 448 12. Mueller-Anneling L, Avol E, Peters JM, and Thorne PS. Ambient endotoxin concentrations  
449 in PM10 from Southern California. *Environmental health perspectives*. 2004;112(5):583-  
450 8.
- 451 13. Andonegui G, Bonder CS, Green F, Mullaly SC, Zbytnuik L, Raharjo E, et al. Endothelium-  
452 derived Toll-like receptor-4 is the key molecule in LPS-induced neutrophil sequestration  
453 into lungs. *The Journal of clinical investigation*. 2003;111(7):1011-20.
- 454 14. Baumgarten G, Knuefermann P, Wrigge H, Putensen C, Stapel H, Fink K, et al. Role of  
455 Toll-like receptor 4 for the pathogenesis of acute lung injury in Gram-negative sepsis. *Eur*  
456 *J Anaesthesiol*. 2006;23(12):1041-8.
- 457 15. Garantziotis S, Li Z, Potts EN, Lindsey JY, Stober VP, Polosukhin VV, et al. TLR4 is  
458 necessary for hyaluronan-mediated airway hyperresponsiveness after ozone inhalation.  
459 *American journal of respiratory and critical care medicine*. 2010;181(7):666-75.
- 460 16. Garantziotis S, Li Z, Potts EN, Kimata K, Zhuo L, Morgan DL, et al. Hyaluronan mediates  
461 ozone-induced airway hyperresponsiveness in mice. *The Journal of biological chemistry*.  
462 2009;284(17):11309-17.
- 463 17. Jiang D, Liang J, Fan J, Yu S, Chen S, Luo Y, et al. Regulation of lung injury and repair  
464 by Toll-like receptors and hyaluronan. *Nature medicine*. 2005;11(11):1173-9.
- 465 18. Stewart CR, Stuart LM, Wilkinson K, van Gils JM, Deng J, Halle A, et al. CD36 ligands  
466 promote sterile inflammation through assembly of a Toll-like receptor 4 and 6 heterodimer.  
467 *Nature immunology*. 2010;11(2):155-61.

- 468 19. Mizel SB, Honko AN, Moors MA, Smith PS, and West AP. Induction of macrophage nitric  
469 oxide production by Gram-negative flagellin involves signaling via heteromeric Toll-like  
470 receptor 5/Toll-like receptor 4 complexes. *J Immunol.* 2003;170(12):6217-23.
- 471 20. Shikhagaie MM, Andersson CK, Mori M, Kortekaas Krohn I, Bergqvist A, Dahl R, et al.  
472 Mapping of TLR5 and TLR7 in central and distal human airways and identification of  
473 reduced TLR expression in severe asthma. *Clinical and experimental allergy : journal of*  
474 *the British Society for Allergy and Clinical Immunology.* 2014;44(2):184-96.
- 475 21. Menendez D, Shatz M, Azzam K, Garantziotis S, Fessler MB, and Resnick MA. The Toll-  
476 like receptor gene family is integrated into human DNA damage and p53 networks. *PLoS*  
477 *genetics.* 2011;7(3):e1001360.
- 478 22. Burdelya LG, Krivokrysenko VI, Tallant TC, Strom E, Gleiberman AS, Gupta D, et al. An  
479 agonist of toll-like receptor 5 has radioprotective activity in mouse and primate models.  
480 *Science.* 2008;320(5873):226-30.
- 481 23. Uematsu S, Fujimoto K, Jang MH, Yang BG, Jung YJ, Nishiyama M, et al. Regulation of  
482 humoral and cellular gut immunity by lamina propria dendritic cells expressing Toll-like  
483 receptor 5. *Nature immunology.* 2008;9(7):769-76.
- 484 24. Wilson RH, Maruoka S, Whitehead GS, Foley JF, Flake GP, Sever ML, et al. The Toll-like  
485 receptor 5 ligand flagellin promotes asthma by priming allergic responses to indoor  
486 allergens. *Nature medicine.* 2012;18(11):1705-10.
- 487 25. Zhang B, Chassaing B, Shi Z, Uchiyama R, Zhang Z, Denning TL, et al. Viral infection.  
488 Prevention and cure of rotavirus infection via TLR5/NLRC4-mediated production of IL-22  
489 and IL-18. *Science.* 2014;346(6211):861-5.
- 490 26. Parapanov R, Lugrin J, Rosenblatt-Velin N, Feihl F, Waeber B, Milano G, et al. Toll-like  
491 receptor 5 deficiency exacerbates cardiac injury and inflammation induced by myocardial  
492 ischaemia-reperfusion in the mouse. *Clin Sci (Lond).* 2015;129(2):187-98.
- 493 27. Fukuzawa N, Petro M, Baldwin WM, 3rd, Gudkov AV, and Fairchild RL. A TLR5 agonist  
494 inhibits acute renal ischemic failure. *J Immunol.* 2011;187(7):3831-9.
- 495 28. Burdelya LG, Gleiberman AS, Toshkov I, Aygun-Sunar S, Bapardekar M, Manderscheid-  
496 Kern P, et al. Toll-like receptor 5 agonist protects mice from dermatitis and oral mucositis  
497 caused by local radiation: implications for head-and-neck cancer radiotherapy.  
498 *International journal of radiation oncology, biology, physics.* 2012;83(1):228-34.
- 499 29. Hawn TR, Verbon A, Lettinga KD, Zhao LP, Li SS, Laws RJ, et al. A common dominant  
500 TLR5 stop codon polymorphism abolishes flagellin signaling and is associated with  
501 susceptibility to legionnaires' disease. *The Journal of experimental medicine.*  
502 2003;198(10):1563-72.
- 503 30. Grube M, Loeffler J, Mezger M, Kruger B, Echtenacher B, Hoffmann P, et al. TLR5 stop  
504 codon polymorphism is associated with invasive aspergillosis after allogeneic stem cell  
505 transplantation. *Medical mycology.* 2013;51(8):818-25.
- 506 31. West TE, Chantratita N, Chierakul W, Limmathurotsakul D, Wuthiekanun V, Myers ND, et  
507 al. Impaired TLR5 functionality is associated with survival in melioidosis. *J Immunol.*  
508 2013;190(7):3373-9.
- 509 32. Gewirtz AT, Vijay-Kumar M, Brant SR, Duerr RH, Nicolae DL, and Cho JH. Dominant-  
510 negative TLR5 polymorphism reduces adaptive immune response to flagellin and  
511 negatively associates with Crohn's disease. *American journal of physiology*  
512 *Gastrointestinal and liver physiology.* 2006;290(6):G1157-63.
- 513 33. Slade R, Watkinson WP, and Hatch GE. Mouse strain differences in ozone dosimetry and  
514 body temperature changes. *The American journal of physiology.* 1997;272(1 Pt 1):L73-7.
- 515 34. Hatch GE, Slade R, Harris LP, McDonnell WF, Devlin RB, Koren HS, et al. Ozone dose  
516 and effect in humans and rats. A comparison using oxygen-18 labeling and  
517 bronchoalveolar lavage. *American journal of respiratory and critical care medicine.*  
518 1994;150(3):676-83.

- 519 35. Chulada PC, Vainorius E, Garantziotis S, Burch LH, Blackshear PJ, and Zeldin DC. The  
520 Environmental Polymorphism Registry: a unique resource that facilitates translational  
521 research of environmental disease. *Environmental health perspectives*.  
522 2011;119(11):1523-7.
- 523 36. McDonald WF, Huleatt JW, Foellmer HG, Hewitt D, Tang J, Desai P, et al. A West Nile  
524 virus recombinant protein vaccine that coactivates innate and adaptive immunity. *J Infect*  
525 *Dis*. 2007;195(11):1607-17.
- 526 37. Gay NJ, Gangloff M, and O'Neill LA. What the Myddosome structure tells us about the  
527 initiation of innate immunity. *Trends in immunology*. 2011;32(3):104-9.
- 528 38. Kawai T, Takeuchi O, Fujita T, Inoue J, Muhlradt PF, Sato S, et al. Lipopolysaccharide  
529 stimulates the MyD88-independent pathway and results in activation of IFN-regulatory  
530 factor 3 and the expression of a subset of lipopolysaccharide-inducible genes. *J Immunol*.  
531 2001;167(10):5887-94.
- 532 39. Yamamoto M, Sato S, Hemmi H, Hoshino K, Kaisho T, Sanjo H, et al. Role of adaptor  
533 TRIF in the MyD88-independent toll-like receptor signaling pathway. *Science*.  
534 2003;301(5633):640-3.
- 535 40. Honda K, and Taniguchi T. IRFs: master regulators of signalling by Toll-like receptors and  
536 cytosolic pattern-recognition receptors. *Nat Rev Immunol*. 2006;6(9):644-58.
- 537 41. Zanoni I, Ostuni R, Marek LR, Barresi S, Barbalat R, Barton GM, et al. CD14 controls the  
538 LPS-induced endocytosis of Toll-like receptor 4. *Cell*. 2011;147(4):868-80.
- 539 42. Motshwene PG, Moncrieffe MC, Grossmann JG, Kao C, Ayaluru M, Sandercock AM, et  
540 al. An oligomeric signaling platform formed by the Toll-like receptor signal transducers  
541 MyD88 and IRAK-4. *The Journal of biological chemistry*. 2009;284(37):25404-11.
- 542 43. Dickey AK, Chantratita N, Tandhavanant S, Ducken D, Lovelace-Macon L, Seal S, et al.  
543 Flagellin-independent effects of a Toll-like receptor 5 polymorphism in the inflammatory  
544 response to *Burkholderia pseudomallei*. *PLoS Negl Trop Dis*. 2019;13(5):e0007354.
- 545 44. Visintin A, Mazzoni A, Spitzer JH, Wyllie DH, Dower SK, and Segal DM. Regulation of  
546 Toll-like receptors in human monocytes and dendritic cells. *J Immunol*. 2001;166(1):249-  
547 55.
- 548 45. Juarez E, Nunez C, Sada E, Ellner JJ, Schwander SK, and Torres M. Differential  
549 expression of Toll-like receptors on human alveolar macrophages and autologous  
550 peripheral monocytes. *Respiratory research*. 2010;11:2.
- 551 46. Irvin CG, and Bates JH. Measuring the lung function in the mouse: the challenge of size.  
552 *Respiratory research*. 2003;4:4.
- 553 47. Frush BW, Li Z, Stiles JV, Cotter SF, Shofer SL, Foster WM, et al. Ozone primes alveolar  
554 macrophage-derived innate immunity in healthy human subjects. *The Journal of allergy*  
555 *and clinical immunology*. 2016;138(4):1213-5 e1.

556
